# Supplementary material
Source: Royal Society of Chemistry journal article supplement (doi:10.1039/d6tc00702c)
Supplement: d6tc00702c1.pdf [file d6tc00702c1.pdf]

## Supporting Information

### Precise site occupation of $\text{Zn}^{2+}$ in $\text{Rb}_2\text{CuBr}_3$ to regulate exciton recombination for violet luminescence

Jiajia Wang,<sup>a, b</sup> Rui Zhou,<sup>a, b</sup> Jie Ren,<sup>a, b</sup> Jingrui Guo,<sup>a, b</sup> Jianyong Zhang,<sup>c</sup> Jing Guo,  
<sup>a, b\*</sup> Na Zhang,<sup>a, b\*</sup> Yufeng Liu,<sup>a, b</sup> Yongzheng Fang<sup>a, b\*</sup>

<sup>a</sup> Faculty of Materials Technology, Shanghai Institute of Technology, Shanghai,  
201418, People's Republic of China

<sup>b</sup> Shanghai Engineering Research Center of Photodetection Materials and Devices,  
Shanghai Institute of Technology, Shanghai 201418, People's Republic of China

<sup>c</sup> School of Chemical and Environmental Engineering, Shanghai Institute of  
Technology, Shanghai, 201418, People's Republic of China

\* E-mail: [guoj@sit.edu.cn](mailto:guoj@sit.edu.cn), [nzhang@sit.edu.cn](mailto:nzhang@sit.edu.cn), [fyz1003@sina.com](mailto:fyz1003@sina.com)

## 1. Supplementary sections

1.1 Computational modeling based on density functional theory

1.2 Fabrication of Violet LED

## 2. Supplementary figures

**Figure S1.** Schematic illustration of the experimental synthesis.

**Figure S2.** Charge density difference isosurface maps. Orange: electron accumulation; Green: electron depletion. (a) Pristine  $\text{Rb}_2\text{CuBr}_3$  (reference), (b)  $\text{Rb}_2\text{CuBr}_3:0.3\text{Zn}^{2+}$ .

**Figure S3.** Rb 3d spectrum with the characteristic main peaks (Rb  $3d_{5/2}$  and Rb  $3d_{3/2}$ ) and satellite features.

**Figure S4.** The fitting curve of  $\text{Rb}_2\text{CuBr}_3$  and  $\text{Rb}_2\text{CuBr}_3:0.3\text{Zn}^{2+}$  in  $|\chi(k)|$  space.

**Figure S5.** The fitting curve of  $\text{Cu}_2\text{O}$  in  $|\chi(k)|$  and  $|\chi(R)|$  space.

**Figure S6.** Wavelet transform diagram of  $\text{Cu}_2\text{O}$ .

**Figure S7.** XPS curve for Zn 2p.

**Figure S8.** Comparison of the experimental XRD patterns for pristine and  $\text{Rb}_2\text{CuBr}_3:0.3\text{Zn}^{2+}$ .

**Figure S9.** EDS analysis of  $\text{Rb}_2\text{CuBr}_3:0.3\text{Zn}^{2+}$ .

**Figure S10.** Bandgap analysis of  $\text{Rb}_2\text{CuBr}_3$  on DFT calculations (Dashed lines: VBM/CBM positions). (a)  $\text{Rb}_2\text{CuBr}_3$ . (b)  $\text{Rb}_2\text{CuBr}_3:\text{Zn}^{2+}$ .

**Figure S11.** The computational band gap values of  $\text{Rb}_2\text{CuBr}_3:x\text{Zn}^{2+}$ .

**Figure S12.** Normalized PLE spectra of  $\text{Rb}_2\text{CuBr}_3$  monitored at 340-385 nm, PL spectra under 240-330 nm irradiation: (a)  $\text{Rb}_2\text{CuBr}_3$ , (b)  $\text{Rb}_2\text{CuBr}_3:0.1\text{Zn}^{2+}$ , (c)  $\text{Rb}_2\text{CuBr}_3:0.2\text{Zn}^{2+}$ , (d)  $\text{Rb}_2\text{CuBr}_3:0.3\text{Zn}^{2+}$ , (e)  $\text{Rb}_2\text{CuBr}_3:0.4\text{Zn}^{2+}$ .

**Figure S13.** Photoluminescence photographs of  $\text{Rb}_2\text{CuBr}_3:x\text{Zn}^{2+}$  upon 302 nm

excitation.

**Figure S14.** The PL intensity of stability evolution of  $\text{Rb}_2\text{CuBr}_3$  and  $\text{Rb}_2\text{CuBr}_3:0.3 \text{Zn}^{2+}$  under ambient storage.

**Figure S15.** PL decay curves of (a)  $\text{Rb}_2\text{CuBr}_3:0.1 \text{Zn}^{2+}$ , (b)  $\text{Rb}_2\text{CuBr}_3:0.2 \text{Zn}^{2+}$ , (c)  $\text{Rb}_2\text{CuBr}_3:0.4 \text{Zn}^{2+}$ .

**Figure S16.** Packaging of a portable device powered by a battery-connected LED.

### 3. Supplementary table

**Table S1.** Main fitting results of the fit performed on the  $k^2$ -Weighted EXAFS spectra for  $\text{Rb}_2\text{CuBr}_3$ , and  $\text{Rb}_2\text{CuBr}_3:0.3 \text{Zn}^{2+}$ .

**Table S2.** The correlation between the feeding ratio and the actual ratio of Zn/Cu.

**Table S3.**  $k_r$  and  $k_{nr}$  recombination rates during the doping process.

**Table S4.** Summary of the device performance of violet LED performance.

## 1. Supplementary sections

### 1.1 Computational modeling based on density functional theory

This study employed the Vienna Ab-initio Simulation Package (VASP) 5.4.4<sup>1</sup> to conduct DFT calculations. The Perdew-Burke-Ernzerhof (PBE) functional within the generalized gradient approximation (GGA) framework<sup>2</sup> was selected as the exchange-correlation functional. This functional has been widely validated for reliably predicting the crystal structure, electronic band gap, defect formation energy, and relative energies of halide perovskites,<sup>3</sup> and is suitable for doping configuration screening.

The calculations utilized the Projector Augmented Wave (PAW) pseudopotential,<sup>4</sup> with a plane-wave cutoff energy of 500 eV (verified to have energy fluctuations  $< 1$  meV/atom). The Brillouin zone integration was performed using a  $5 \times 5 \times 1$  Monkhorst-Pack k-grid centered at the  $\Gamma$  point (verified to ensure energy convergence to 1 meV through density testing). A 15 Å vacuum layer was set in the non-periodic direction (verified to have interlayer interaction energy  $< 1$  meV through thickness testing). All atomic positions were fully relaxed until the energy change was  $\leq 1 \times 10^{-6}$  eV and the atomic force was  $\leq 0.01$  eV/Å. Additionally, DFT-D3<sup>5</sup> dispersion correction (Becke-Jonson damping) was introduced to accurately describe van der Waals interactions.

Based on the aforementioned static calculations, we computed the band structures of both undoped and Zn-doped  $\text{Rb}_2\text{CuBr}_3$ , analyzed the density of states (DOS) at the doping sites, and evaluated the formation energies across various doping configurations. The Fermi level of pure  $\text{Rb}_2\text{CuBr}_3$  is taken as the reference zero point for the band structure and DOS. To investigate the feasibility of doping and substitution

at various lattice sites, the formation energy was calculated using the following equations<sup>6</sup>:

$$E_{1\text{form}}^{\text{doped}} = E_{\text{total}}(\text{Zn doped}) - [E_{\text{total}}(\text{Pure}) + \mu_{\text{Zn}} - \mu_{\text{Rb}}] \quad (1)$$

$$E_{2\text{form}}^{\text{doped}} = E_{\text{total}}(\text{Zn doped}) - [E_{\text{total}}(\text{Pure}) + \mu_{\text{Zn}} - \mu_{\text{Cu}}] \quad (2)$$

$$E_{\text{form}}^{\text{int}} = E_{\text{total}}(X_{\text{int}}) - [E_{\text{total}}(\text{Pure}) + \mu_x] \quad (3)$$

Where  $E_{\text{form}}^{\text{doped}}$  and  $E_{\text{form}}^{\text{int}}$  represent doping formation energy and interstitial formation energy respectively.  $E_{\text{total}}(\text{Zn doped})$  and  $E_{\text{total}}(X_{\text{int}})$  are respectively the total energies containing Zn dopant and X interstitial.  $E_{\text{total}}(\text{pure})$  is the total energy of an undoped  $\text{Rb}_2\text{CuBr}_3$ .  $\mu_{\text{Rb}}$ ,  $\mu_{\text{Cu}}$  and  $\mu_{\text{Zn}}$  are the chemical potential energies of Rb, Cu and Zn atoms, respectively.

## 1.2 Fabrication of violet LED

The prepared violet-blue emitting  $\text{Rb}_2\text{CuBr}_3:0.3\text{Zn}^{2+}$  perovskite material was coated onto a 295 nm UV chip for violet LED fabrication. Optical characterization of the violet-blue LED was performed with an LED analyzer (HP9000) across a range of drive currents (mA). Subsequently, integrating the packaged chip with a portable power supply allows for the fabrication of a portable LED device.

## 2. Supplementary figures

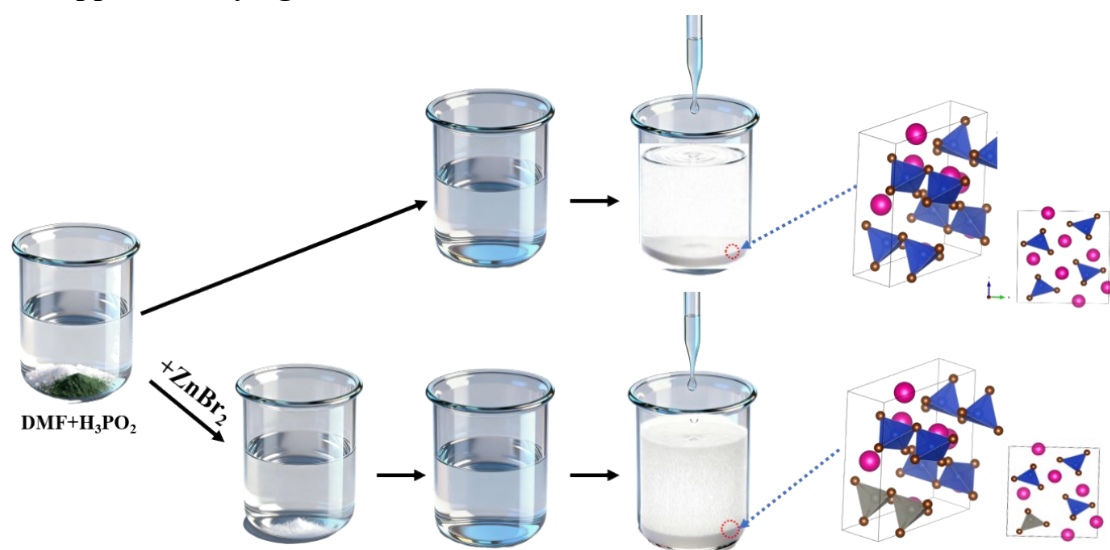

**Figure S1.** Schematic illustration of the experimental synthesis.

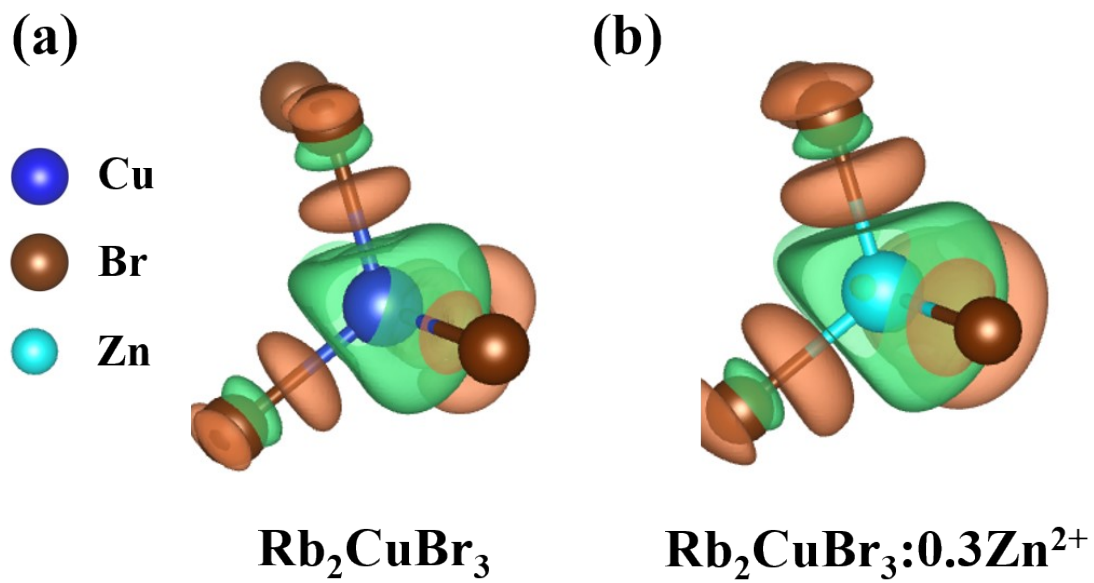

Figure S2 Charge density difference isosurface maps. orange: electron accumulation; green: electron depletion. (a) Pristine Rb<sub>2</sub>CuBr<sub>3</sub> (reference), (b) Rb<sub>2</sub>CuBr<sub>3</sub>:0.3Zn<sup>2+</sup>.

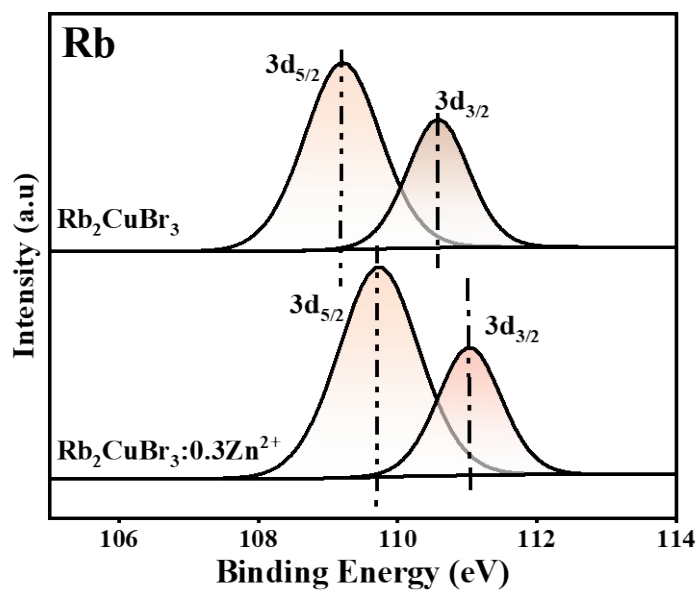

**Figure S3.** Rb 3d spectrum with the characteristic main peaks (Rb  $3d_{5/2}$  and Rb  $3d_{3/2}$ ) and satellite features.

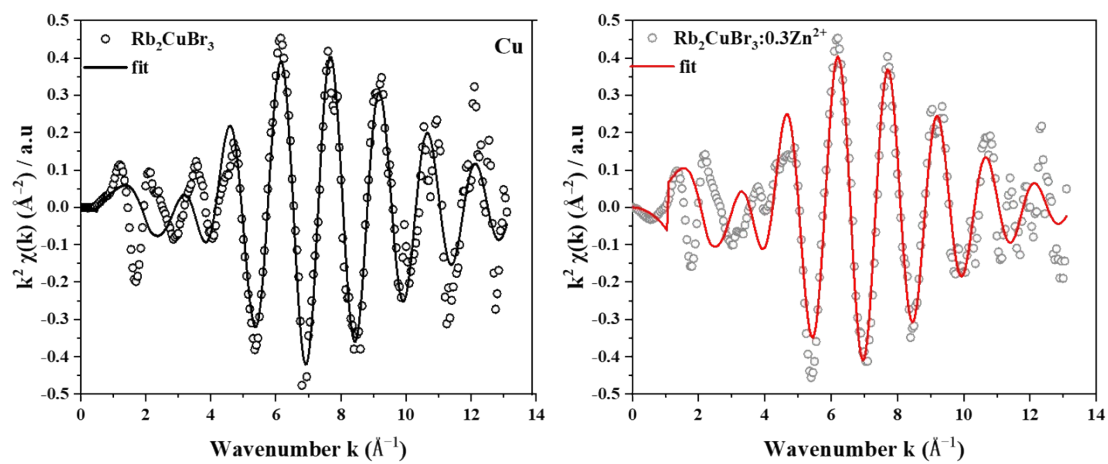

**Figure S4.** The fitting curve of  $\text{Rb}_2\text{CuBr}_3$  and  $\text{Rb}_2\text{CuBr}_3:0.3\text{Zn}^{2+}$  in  $|\chi(k)|$  space.

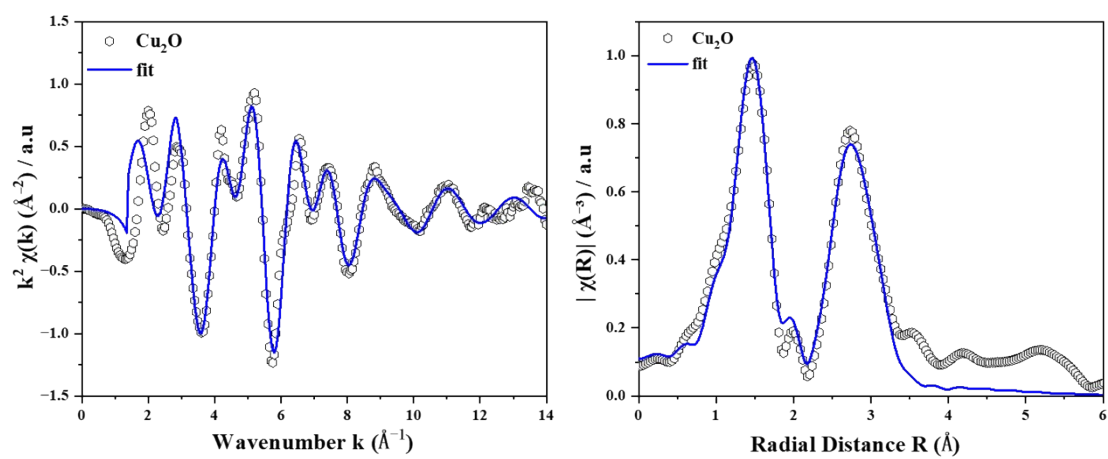

**Figure S5.** The fitting curve of  $\text{Cu}_2\text{O}$  in  $|\chi(k)|$  and  $|\chi(R)|$  space.

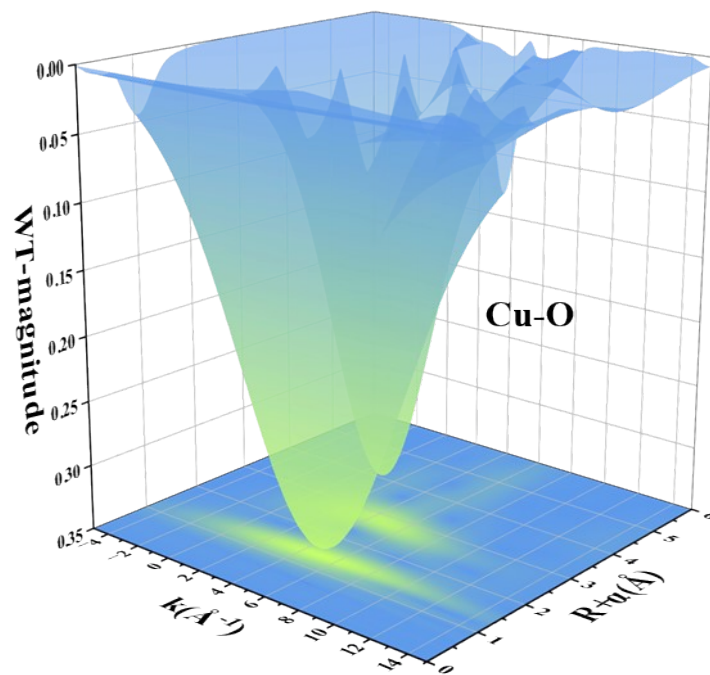

**Figure S6.** Wavelet transform diagram of Cu<sub>2</sub>O.

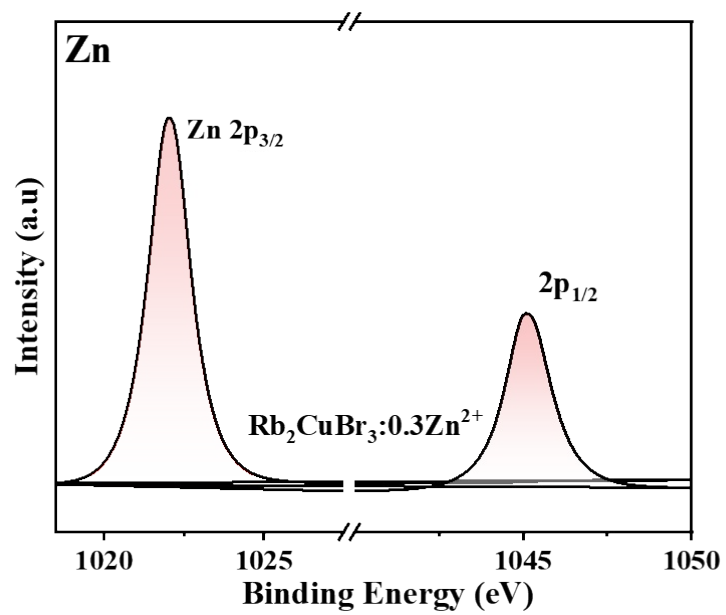

Figure S7. XPS curve for Zn 2p.

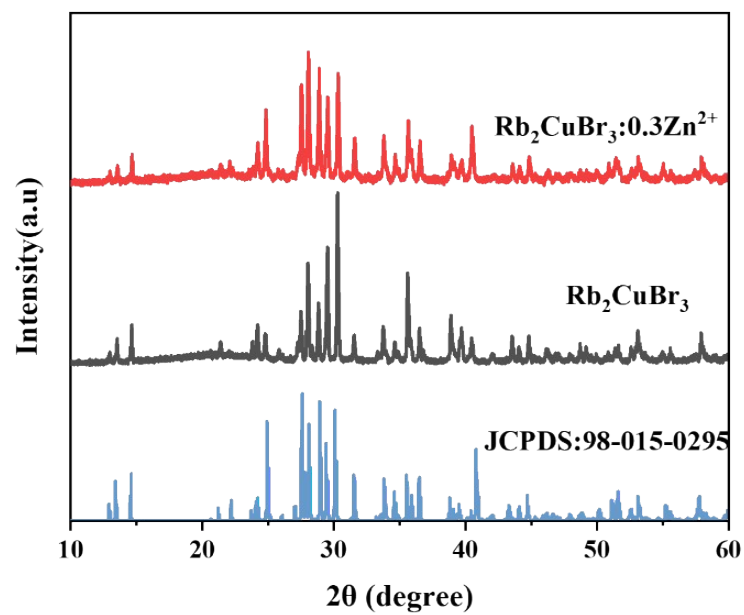

**Figure S8.** Comparison of the experimental XRD patterns for pristine and  $\text{Rb}_2\text{CuBr}_3:0.3\text{Zn}^{2+}$ .

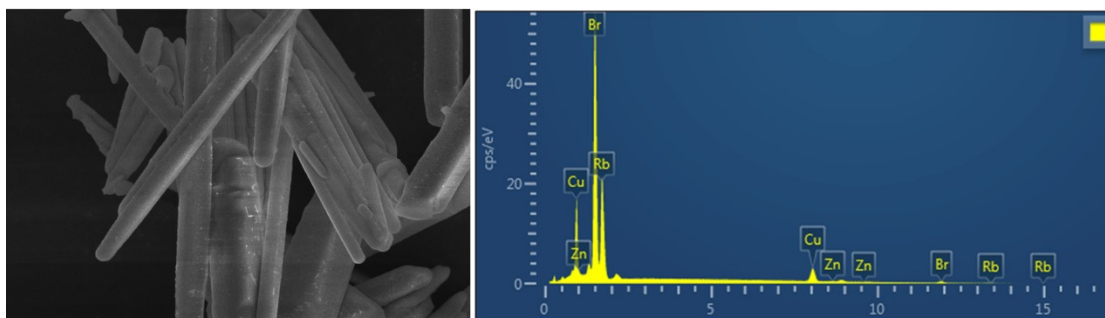

**Figure S9.** EDS analysis of  $\text{Rb}_2\text{CuBr}_3:0.3\text{Zn}^{2+}$ .

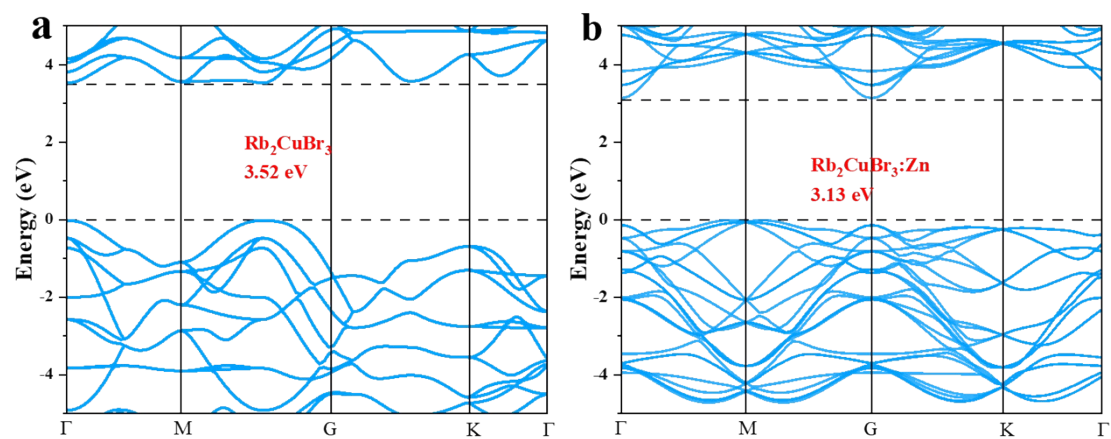

**Figure S10.** Bandgap analysis of  $\text{Rb}_2\text{CuBr}_3$  on DFT calculations (Dashed lines: VBM/CBM positions). (a)  $\text{Rb}_2\text{CuBr}_3$ . (b)  $\text{Rb}_2\text{CuBr}_3:0.25\text{Zn}^{2+}$ .

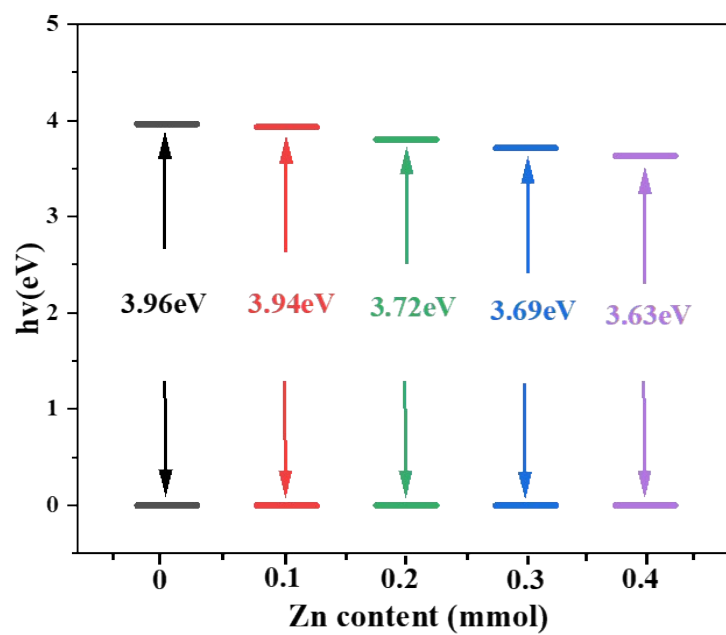

**Figure S11.** The computational band gap values of  $\text{Rb}_2\text{CuBr}_3:\text{xZn}^{2+}$ .

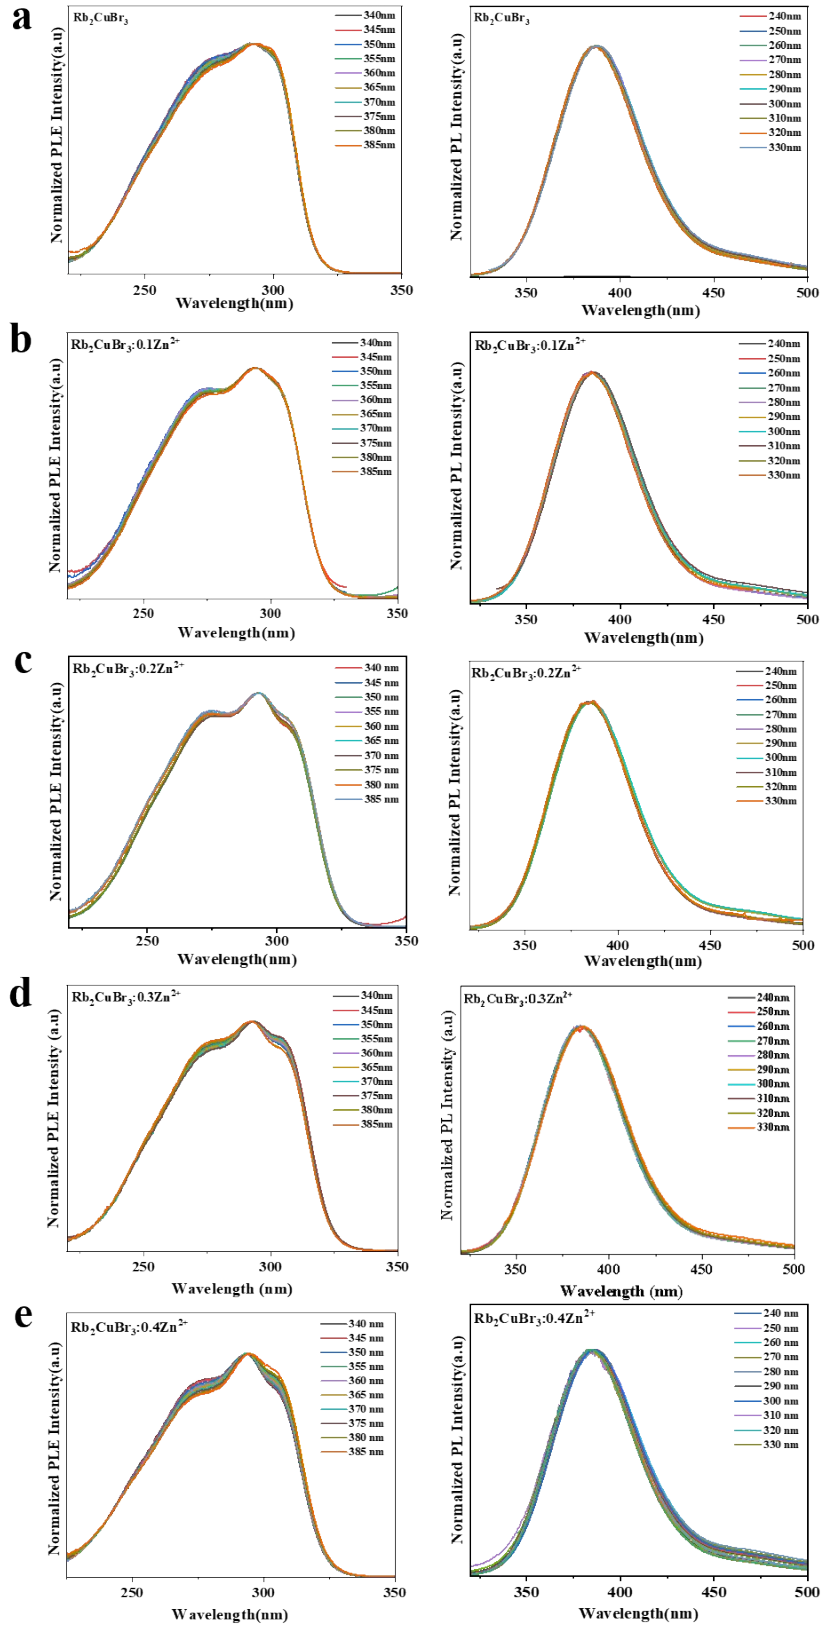

**Figure S12.** Normalized PLE spectra of  $\text{Rb}_2\text{CuBr}_3$  monitored at 340-385 nm, PL spectra under 240-330 nm irradiation: (a)  $\text{Rb}_2\text{CuBr}_3$ , (b)  $\text{Rb}_2\text{CuBr}_3:0.1\text{Zn}^{2+}$ , (c)  $\text{Rb}_2\text{CuBr}_3:0.2\text{Zn}^{2+}$ , (d)  $\text{Rb}_2\text{CuBr}_3:0.3\text{Zn}^{2+}$ , (e)  $\text{Rb}_2\text{CuBr}_3:0.4\text{Zn}^{2+}$ .

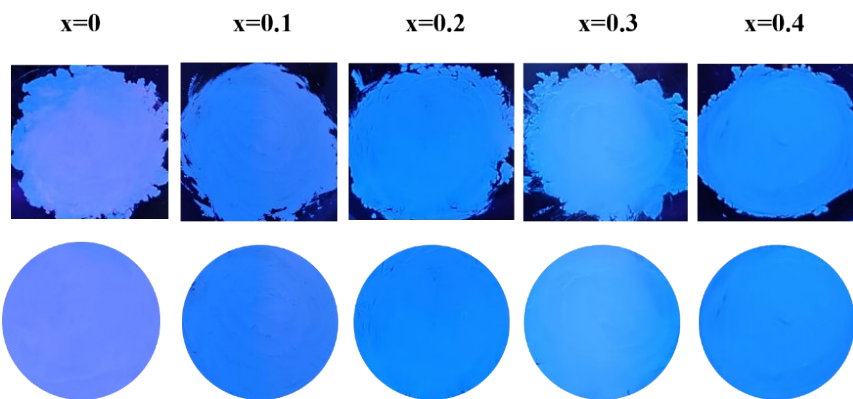

**Figure S13.** Photoluminescence photographs of  $\text{Rb}_2\text{CuBr}_3:\text{xZn}^{2+}$  upon 302 nm excitation.

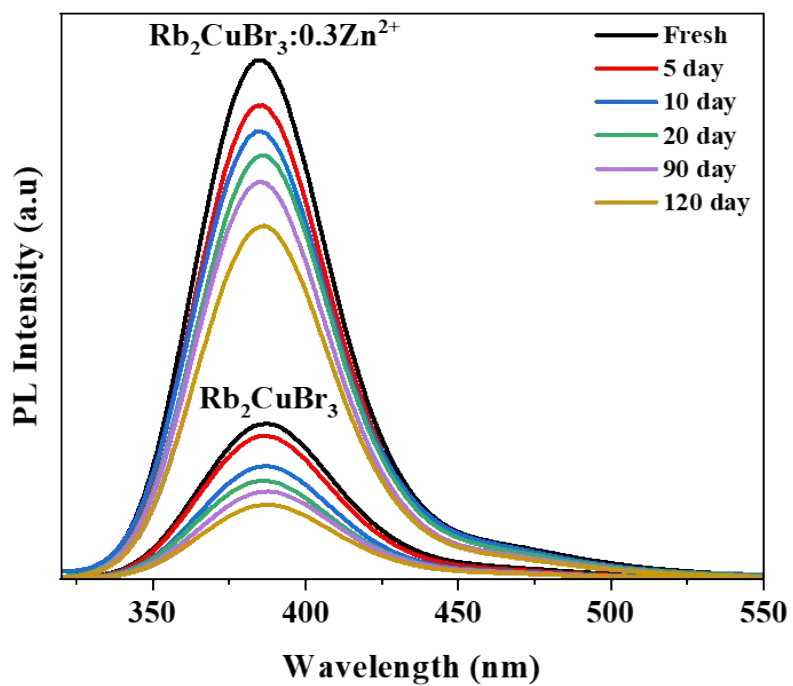

**Figure S14.** The PL intensity of stability evolution of  $\text{Rb}_2\text{CuBr}_3$  and  $\text{Rb}_2\text{CuBr}_3:0.3\text{Zn}^{2+}$  under ambient storage.

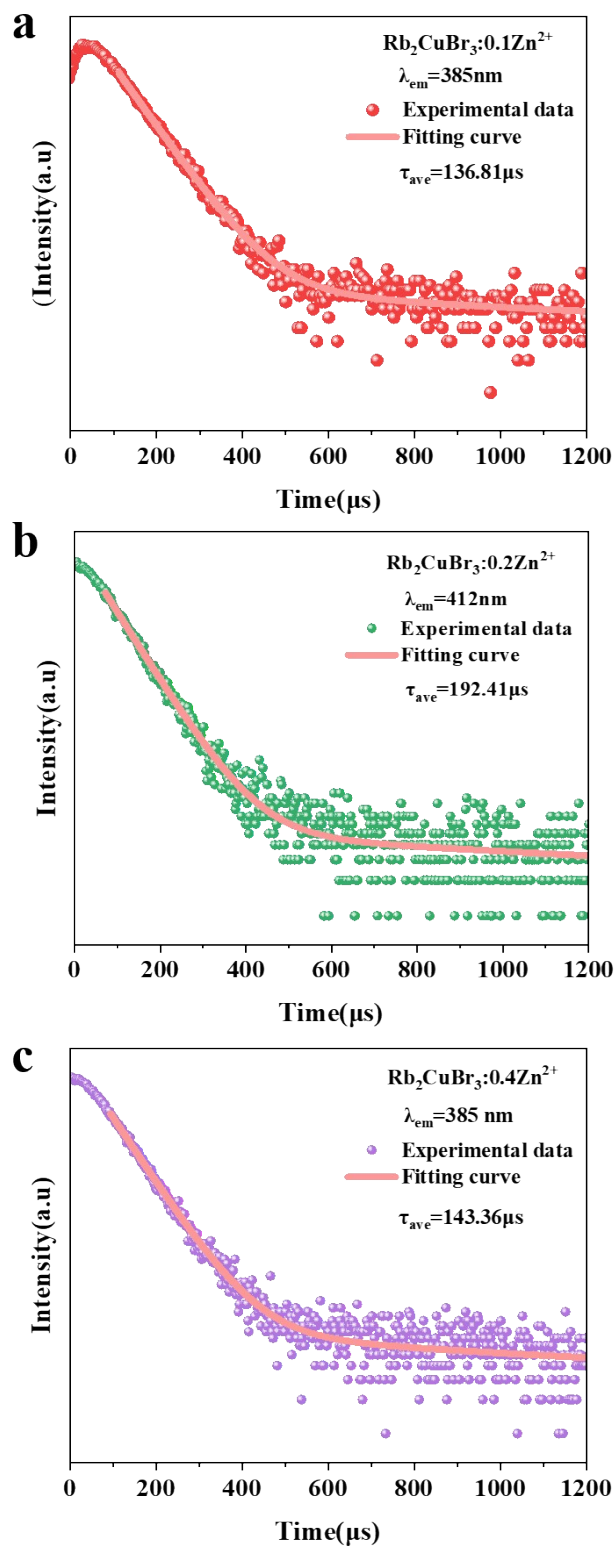

**Figure S15.** PL decay curves of (a)  $\text{Rb}_2\text{CuBr}_3:0.1\text{Zn}^{2+}$ , (b)  $\text{Rb}_2\text{CuBr}_3:0.2\text{Zn}^{2+}$ , (c)  $\text{Rb}_2\text{CuBr}_3:0.4\text{Zn}^{2+}$ .

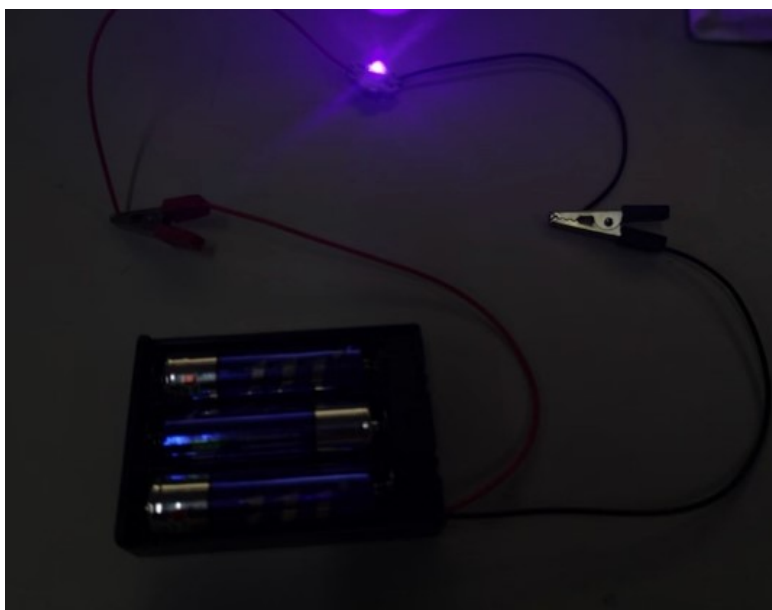

**Figure S16.** Packaging of a portable device powered by a battery-connected LED.

### 3. Supplementary table

**Table S1.** Main fitting results of the fit performed on the  $k^2$ -weighted EXAFS spectra for  $\text{Rb}_2\text{CuBr}_3$ , and  $\text{Rb}_2\text{CuBr}_3:0.3 \text{Zn}^{2+}$ .

| Sample                                       | Path  | CN <sup>a</sup> | R ( $\text{\AA}$ ) <sup>b</sup> | $\sigma^2$ ( $\text{\AA}^2$ ) <sup>c</sup> | $\Delta E_0$ (eV) <sup>d</sup> | R factor <sup>e</sup> |
|----------------------------------------------|-------|-----------------|---------------------------------|--------------------------------------------|--------------------------------|-----------------------|
| $\text{Rb}_2\text{CuBr}_3$                   | Cu-Br | 3.9 $\pm$ 0.1   | 2.56 $\pm$ 0.01                 | 0.0094 $\pm$ 0.0012                        | 1.1 $\pm$ 1.8                  | 0.0123                |
| $\text{Rb}_2\text{CuBr}_3:0.3\text{Zn}^{2+}$ | Cu-Br | 4.1 $\pm$ 0.1   | 2.44 $\pm$ 0.01                 | 0.0125 $\pm$ 0.0010                        | 2.2 $\pm$ 1.3                  | 0.0060                |

<sup>a</sup>CN: coordination numbers; <sup>b</sup>R: bond distance; <sup>c</sup> $\sigma^2$ : Debye-Waller factors; <sup>d</sup> $\Delta E_0$ : the inner potential correction. <sup>e</sup>R factor: goodness of fit.

**Table S2.** The correlation between the feeding ratio and the actual ratio of Zn/Cu.

| Feeding amount of ZnBr <sub>2</sub> (mmol) | Feeding ratio of Zn/Cu (%) | Actual Zn (mg/L) | Actual Cu (mg/L) | Actual ratio of Zn/Cu (%) | Actual/feeding Zn amount (%) |
|--------------------------------------------|----------------------------|------------------|------------------|---------------------------|------------------------------|
| 0.1                                        | 10                         | 54.88            | 593.03           | 9.3                       | 92.5                         |
| 0.2                                        | 20                         | 88.78            | 507.19           | 17.5                      | 87.5                         |
| 0.3                                        | 30                         | 120.09           | 486.36           | 24.7                      | 82.3                         |
| 0.4                                        | 40                         | 135.35           | 486.25           | 27.8                      | 69.6                         |

**Table S3.**  $k_r$  and  $k_{nr}$  recombination rates during the doping process.

| Sample                                                 | $\tau$ ( $\times 10^{-6}$ s) | PLQY (%) | $k_r$ ( $s^{-1}$ ) | $k_{nr}$ ( $s^{-1}$ ) |
|--------------------------------------------------------|------------------------------|----------|--------------------|-----------------------|
| Rb <sub>2</sub> CuBr <sub>3</sub>                      | 126.20                       | 51.4     | 4073               | 3851                  |
| Rb <sub>2</sub> CuBr <sub>3</sub> :0.1Zn <sup>2+</sup> | 136.81                       | 53.6     | 3917               | 3391                  |
| Rb <sub>2</sub> CuBr <sub>3</sub> :0.2Zn <sup>2+</sup> | 194.41                       | 64.6     | 3322               | 1821                  |
| Rb <sub>2</sub> CuBr <sub>3</sub> :0.3Zn <sup>2+</sup> | 254.99                       | 70.6     | 2773               | 1149                  |
| Rb <sub>2</sub> CuBr <sub>3</sub> :0.4Zn <sup>2+</sup> | 143.36                       | 63.1     | 4401               | 2574                  |

**Table S4.** Summary of the device performance of violet LED performance.

| Emission materials                                              | EL <sub>λ<sub>max</sub></sub> (nm) | PLQY (%) | EQE <sub>max</sub> (%) |
|-----------------------------------------------------------------|------------------------------------|----------|------------------------|
| PEA <sub>2</sub> PbBr <sub>4</sub> film <sup>7</sup>            | 410                                | 10       | 0.04                   |
| PEA <sub>2</sub> PbBr <sub>4</sub> NPs <sup>8</sup>             | 410                                | 15-20    | 0.31                   |
| Cs <sub>3</sub> Sb <sub>2</sub> Br <sub>9</sub> QD <sup>9</sup> | 408                                | 51.2     | 0.206                  |
| Rb <sub>2</sub> CuBr <sub>3</sub> :0.3Zn <sup>2+</sup>          | 385                                | 70.6     | 0.22                   |

#### 4. Reference

- [1] H. Wang, Y. C. Gan, H. Y. Geng and X.-R. Chen, *Comput. Phys. Commun.*, 2022, 281, 108495.
- [2] A. V. Ivanov, A. Patterson, M. Bothe, C. Sünderhauf, B. K. Berntson, J. J. Mortensen, M. Kuisma, E. Campbell and R. Izsák, *J. Chem. Theory Comput.*, 2025, 21, 7360.
- [3] P. E. Blöchl, *Phys. Rev. B*, 1994, 50, 17953.
- [4] E. W. Caetano, J. B. Silva, C. H. Bruno, E. L. Albuquerque, B. P. e Silva, R. C. dos Santos, A. M. Teixeira and V. N. Freire, *J. Mol. Struct.*, 2024, 1300, 137228.
- [5] I. U. Nabi Lone, M. M. Sheik Sirajuddeen, S. B. Mohamed and S. Khalid, *Mater. Chem. Phys.*, 2021, 260, 124159.
- [6] Z.-J. Yong, S.-Q. Guo, J.-P. Ma, J.-Y. Zhang, Z.-Y. Li, Y.-M. Chen, B.-B. Zhang, Y. Zhou, J. Shu, J.-L. Gu, L.-R. Zheng, O. M. Bakr and H.-T. Sun, *J. Am. Chem. Soc.*, 2018, 140, 9942.
- [7] L. Bai, S. Wang, Y. Zhang, K. Zhang, H. Li, K. Ou and L. Yi, *J. Lumin.*, 2020, 226, 117422.
- [8] W. Deng, X. Jin, Y. Lv, X. Zhang, X. Zhang and J. Jie, *Adv. Funct. Mater.*, 2019, 29, 1903861.
- [9] Z. Ma, Z. Shi, D. Yang, F. Zhang, S. Li, L. Wang, D. Wu, Y. Zhang, G. Na, L. Zhang, X. Li, Y. Zhang and C. Shan, *ACS Energy Lett.*, 2019, 5, 385.
